# Supplementary material for: Interplay between BRCA1 and RHAMM Regulates Epithelial Apicobasal Polarization and May Influence Risk of Breast Cancer
Source: PLoS Biol. 2011 Nov 15;9(11):e1001199. doi: 10.1371/journal.pbio.1001199 (PMC3217025; doi:10.1371/journal.pbio.1001199)
Supplement: Table S1 — Variants typed in 5q34 to produce a NPL score (affected only analysis) of 4.24 among BRCA1 mutation carrier families. (XLS) [file pbio.1001199.s013.xls]

## Sheet: 5q34 linkage
Table S1 Variants typed in 5q34 to produce a NPL score (affected only analysis) of 4.24 among BRCA1 mutation carrier families
Gene	Nucleotide change	Amino acid change	Minor allele frequency (%)	rs#	NCBI build 36.3 (HSA5 bp)	r2 rs299290 HapMap CEU phase III
CCNG1	C > T	---	37.85	rs299322	162799126	0.78
CCNG1	A > G	---	2.55	rs2069345	162799242	0.02
HMMR	G > A	R317H (NP_036617)	6.21	rs2303078	162833734	0.01
HMMR	T > C	V353A (NP_036617)	18.83	rs299290	162835094	1
HMMR	T > C	A469V (NP_036617)	16.98	rs299295	162842294	0.76
